# Supplementary material
Source: Research Square preprint supplement (doi:10.21203/rs.3.rs-10174470/v1)
Supplement: Supplementary file 1 [file fa0bff3c4adc3d088a0d7e5d.docx]

# **Appendix — Downstream Pathway-Symptom Analysis: Complete Results Tables**

*Multi-gene-set TWAS enrichment across 12 MDD symptom dimensions (10 KEGG pathways)*

Source: /content/088CvAp5_results | Mode: multi-gene-set | Generated 2026-06-26 | Thresholds: raw p<0.05; FDR<0.05; |Stouffer Z|>1.96; |Cohen d|>0.5; |Lin CCC|>0.5; sign-concordance>0.7; |Kendall τ|>0.3; |Pearson r|>0.3; |rank-biserial|>0.3

## **A1 | Gene-set association-strength ranking**

| **Gene-set** | **n sig. symptoms** | **mean |Stouffer|** | **max |Stouffer|** | **mean coverage (%)** |
| --- | --- | --- | --- | --- |
| KEGG_FATTY_ACID_DEGRADATION | 8 | 2.520 | 5.248 | 81.40 |
| KEGG_REGULATION_OF_ACTIN_CYTOSKELETON | 6 | 1.719 | 3.504 | 76.74 |
| KEGG_RAS_SIGNALING_PATHWAY | 5 | 1.576 | 2.455 | 71.68 |
| KEGG_MAPK_SIGNALING_PATHWAY | 5 | 1.561 | 3.590 | 73.99 |
| KEGG_PPAR_SIGNALING_PATHWAY | 4 | 1.414 | 2.724 | 78.90 |
| KEGG_SYNAPTIC_VESICLE_CYCLE | 4 | 1.334 | 2.891 | 73.40 |
| KEGG_ENDOCYTOSIS | 3 | 1.696 | 6.416 | 84.67 |
| KEGG_AUTOPHAGY_ANIMAL | 3 | 1.592 | 5.929 | 82.80 |
| KEGG_CITRATE_CYCLE_TCA_CYCLE | 2 | 1.255 | 2.674 | 86.70 |
| KEGG_NEUROACTIVE_LIGAND_RECEPTOR_INTERACTION | 2 | 1.198 | 4.245 | 66.23 |

## **A2 | Symptom clustering (shared pathway biology)**

**Table A2a.** Flat clusters from pairwise Lin's CCC (12 symptoms).

| **Cluster** | **Member symptom dimensions** |
| --- | --- |
| Cluster 1 | twas_MDD3b_weightGain; twas_MDD4b_sleepMore |
| Cluster 2 | twas_MDD3a_weightLoss; twas_MDD4a_sleepProb; twas_MDD5a_psychomotorFast |
| Cluster 3 | twas_MDD1_depressed; twas_MDD2_anhedonia; twas_MDD6_fatigue; twas_MDD8_concentration |
| Cluster 4 | twas_MDD5b_psychomotorSlow; twas_MDD7_worthless; twas_MDD9_death |

**Table A2b.** Most similar symptom pairs (highest |Lin's CCC|).

| **Symptom 1** | **Symptom 2** | **Lin's CCC** |
| --- | --- | --- |
| twas_MDD1_depressed | twas_MDD2_anhedonia | 0.360 |
| twas_MDD3a_weightLoss | twas_MDD3b_weightGain | -0.321 |
| twas_MDD2_anhedonia | twas_MDD8_concentration | 0.253 |
| twas_MDD6_fatigue | twas_MDD8_concentration | 0.239 |
| twas_MDD1_depressed | twas_MDD6_fatigue | 0.235 |
| twas_MDD2_anhedonia | twas_MDD6_fatigue | 0.234 |
| twas_MDD4a_sleepProb | twas_MDD5a_psychomotorFast | 0.224 |
| twas_MDD1_depressed | twas_MDD8_concentration | 0.204 |
| twas_MDD3b_weightGain | twas_MDD4b_sleepMore | 0.179 |
| twas_MDD7_worthless | twas_MDD9_death | 0.174 |

## **A3 | Per-disease enrichment (all 110 significant findings)**

| **Gene-set** | **Symptom [tissue]** | **n** | **Stouffer Z** | **perm p** | **Wilcoxon p** |
| --- | --- | --- | --- | --- | --- |
| REG_ACTIN_CYTOSKELETON | MDD2_anhedonia [Amygdala] | 110 | 3.654 | — | 7.7e-05 |
| CITRATE_CYCLE_TCA | MDD1_depressed [Hippocampus] | 20 | 2.238 | — | 1.34e-04 |
| ENDOCYTOSIS | MDD4b_sleepMore | 212 | -6.416 | 0.0004 | 4.92e-04 |
| NEUROACTIVE_LIGAND_REC | MDD2_anhedonia [Frontal_Cortex_BA9] | 168 | -3.611 | — | 5.95e-04 |
| AUTOPHAGY_ANIMAL | MDD3a_weightLoss | 140 | -5.928 | 0.0008 | 0.00827 |
| ENDOCYTOSIS | MDD4b_sleepMore [ACC_BA24] | 155 | -3.137 | — | 0.00337 |
| PPAR_SIGNALING | MDD9_death [ACC_BA24] | 46 | -3.169 | — | 0.00341 |
| FATTY_ACID_DEGRADATION | MDD7_worthless | 35 | -5.247 | 0.0037 | 7.3e-04 |
| ENDOCYTOSIS | MDD3b_weightGain [Caudate] | 155 | 2.856 | — | 0.00427 |
| ENDOCYTOSIS | MDD4b_sleepMore [Amygdala] | 145 | -2.651 | — | 0.00433 |
| ENDOCYTOSIS | MDD4b_sleepMore [Hippocampus] | 143 | -2.927 | — | 0.00449 |
| CITRATE_CYCLE_TCA | MDD6_fatigue [Hippocampus] | 20 | 2.216 | — | 0.00730 |
| NEUROACTIVE_LIGAND_REC | MDD4b_sleepMore [ACC_BA24] | 140 | -2.226 | — | 0.00805 |
| ENDOCYTOSIS | MDD4b_sleepMore [Nuc_accumbens] | 162 | -2.588 | — | 0.00859 |
| FATTY_ACID_DEGRADATION | MDD3b_weightGain [Nuc_accumbens] | 29 | 2.512 | — | 0.00859 |
| MAPK_SIGNALING | MDD5b_psychomotorSlow [Caudate] | 148 | -2.893 | — | 0.00873 |
| FATTY_ACID_DEGRADATION | MDD7_worthless [Caudate] | 32 | -2.737 | — | 0.01085 |
| FATTY_ACID_DEGRADATION | MDD2_anhedonia [Frontal_Cortex_BA9] | 30 | -2.294 | — | 0.01366 |
| MAPK_SIGNALING | MDD7_worthless [Nuc_accumbens] | 141 | -2.135 | — | 0.01396 |
| AUTOPHAGY_ANIMAL | MDD3a_weightLoss [Amygdala] | 91 | -2.809 | — | 0.01429 |
| NEUROACTIVE_LIGAND_REC | MDD2_anhedonia [ACC_BA24] | 140 | -2.116 | — | 0.01556 |
| AUTOPHAGY_ANIMAL | MDD3a_weightLoss [ACC_BA24] | 100 | -2.965 | — | 0.01594 |
| NEUROACTIVE_LIGAND_REC | MDD2_anhedonia [Amygdala] | 151 | -2.227 | — | 0.01622 |
| CITRATE_CYCLE_TCA | MDD5a_psychomotorFast [Hippocampus] | 20 | 2.017 | — | 0.01718 |
| AUTOPHAGY_ANIMAL | MDD3b_weightGain [Nuc_accumbens] | 110 | 2.268 | — | 0.01725 |
| FATTY_ACID_DEGRADATION | MDD7_worthless [Nuc_accumbens] | 29 | -2.229 | — | 0.019 |
| NEUROACTIVE_LIGAND_REC | MDD2_anhedonia | 247 | -4.245 | 0.0192 | 0.00372 |
| FATTY_ACID_DEGRADATION | MDD7_worthless [Hippocampus] | 25 | -2.170 | — | 0.02191 |
| FATTY_ACID_DEGRADATION | MDD8_concentration | 35 | -4.068 | 0.0224 | 0.06014 |
| AUTOPHAGY_ANIMAL | MDD3b_weightGain [Amygdala] | 91 | 2.304 | — | 0.02262 |
| ENDOCYTOSIS | MDD3b_weightGain | 212 | 3.987 | 0.0239 | 0.02609 |
| REG_ACTIN_CYTOSKELETON | MDD8_concentration [Caudate] | 135 | 2.379 | — | 0.0241 |
| AUTOPHAGY_ANIMAL | MDD2_anhedonia [Amygdala] | 92 | 2.490 | — | 0.02619 |
| AUTOPHAGY_ANIMAL | MDD3a_weightLoss [Frontal_Cortex_BA9] | 107 | -2.741 | — | 0.0269 |
| CITRATE_CYCLE_TCA | MDD5b_psychomotorSlow [Caudate] | 24 | 2.450 | — | 0.02913 |
| FATTY_ACID_DEGRADATION | MDD3b_weightGain [ACC_BA24] | 26 | 1.693 | — | 0.02915 |
| RAS_SIGNALING | MDD6_fatigue [Caudate] | 125 | 2.266 | — | 0.02967 |
| CITRATE_CYCLE_TCA | MDD1_depressed [Frontal_Cortex_BA9] | 22 | 1.540 | — | 0.03012 |
| NEUROACTIVE_LIGAND_REC | MDD9_death [ACC_BA24] | 140 | 1.987 | — | 0.03301 |
| ENDOCYTOSIS | MDD4b_sleepMore [Caudate] | 155 | -2.307 | — | 0.03426 |
| REG_ACTIN_CYTOSKELETON | MDD3a_weightLoss [Amygdala] | 109 | -2.438 | — | 0.03445 |
| AUTOPHAGY_ANIMAL | MDD1_depressed [Amygdala] | 92 | 2.222 | — | 0.03549 |
| REG_ACTIN_CYTOSKELETON | MDD3a_weightLoss [Nuc_accumbens] | 114 | -2.538 | — | 0.03579 |
| FATTY_ACID_DEGRADATION | MDD9_death [Amygdala] | 22 | 2.071 | — | 0.03587 |
| ENDOCYTOSIS | MDD4a_sleepProb [Hippocampus] | 143 | -2.014 | — | 0.03592 |
| FATTY_ACID_DEGRADATION | MDD3b_weightGain | 35 | 3.797 | 0.036 | 0.02873 |
| RAS_SIGNALING | MDD6_fatigue [Frontal_Cortex_BA9] | 111 | 2.144 | — | 0.03618 |
| FATTY_ACID_DEGRADATION | MDD7_worthless [Frontal_Cortex_BA9] | 30 | -2.048 | — | 0.03644 |
| SYNAPTIC_VESICLE_CYCLE | MDD5b_psychomotorSlow [Amygdala] | 32 | 1.589 | — | 0.03943 |
| ENDOCYTOSIS | MDD3b_weightGain [Amygdala] | 146 | 2.115 | — | 0.03958 |
| REG_ACTIN_CYTOSKELETON | MDD2_anhedonia [Nuc_accumbens] | 114 | 2.102 | — | 0.03997 |
| RAS_SIGNALING | MDD2_anhedonia [ACC_BA24] | 124 | -1.859 | — | 0.04014 |
| REG_ACTIN_CYTOSKELETON | MDD8_concentration [Nuc_accumbens] | 115 | 1.974 | — | 0.04163 |
| MAPK_SIGNALING | MDD5a_psychomotorFast [Hippocampus] | 140 | -1.580 | — | 0.04561 |
| MAPK_SIGNALING | MDD7_worthless | 223 | -3.590 | 0.0482 | 0.03251 |
| NEUROACTIVE_LIGAND_REC | MDD8_concentration [Amygdala] | 148 | -1.719 | — | 0.04886 |
| RAS_SIGNALING | MDD1_depressed [ACC_BA24] | 124 | -1.736 | — | 0.04999 |
| SYNAPTIC_VESICLE_CYCLE | MDD4b_sleepMore [Hippocampus] | 37 | 2.003 | — | 0.05086 |
| ENDOCYTOSIS | MDD1_depressed [Nuc_accumbens] | 163 | 2.044 | — | 0.05356 |
| PPAR_SIGNALING | MDD7_worthless [Nuc_accumbens] | 49 | -2.063 | — | 0.05565 |
| REG_ACTIN_CYTOSKELETON | MDD2_anhedonia | 179 | 3.504 | 0.056 | 0.06274 |
| FATTY_ACID_DEGRADATION | MDD4b_sleepMore [Nuc_accumbens] | 29 | 2.490 | — | 0.0592 |
| FATTY_ACID_DEGRADATION | MDD8_concentration [Caudate] | 32 | -2.319 | — | 0.05955 |
| SYNAPTIC_VESICLE_CYCLE | MDD3a_weightLoss [Hippocampus] | 37 | -2.076 | — | 0.06084 |
| FATTY_ACID_DEGRADATION | MDD1_depressed [Amygdala] | 21 | -2.314 | — | 0.06465 |
| MAPK_SIGNALING | MDD2_anhedonia [Hippocampus] | 140 | -2.125 | — | 0.06749 |
| AUTOPHAGY_ANIMAL | MDD3a_weightLoss [Nuc_accumbens] | 110 | -2.628 | — | 0.06775 |
| AUTOPHAGY_ANIMAL | MDD3b_weightGain | 140 | 3.226 | 0.0711 | 0.02955 |
| MAPK_SIGNALING | MDD2_anhedonia [ACC_BA24] | 154 | -2.050 | — | 0.07695 |
| RAS_SIGNALING | MDD5a_psychomotorFast [Hippocampus] | 115 | 2.389 | — | 0.08259 |
| ENDOCYTOSIS | MDD4b_sleepMore [Frontal_Cortex_BA9] | 152 | -2.251 | — | 0.08479 |
| RAS_SIGNALING | MDD1_depressed [Caudate] | 125 | 2.380 | — | 0.08569 |
| FATTY_ACID_DEGRADATION | MDD2_anhedonia | 35 | -3.016 | 0.0868 | 0.05566 |
| MAPK_SIGNALING | MDD2_anhedonia | 222 | -3.112 | 0.0909 | 0.1519 |
| FATTY_ACID_DEGRADATION | MDD1_depressed | 35 | -2.909 | 0.0935 | 0.5223 |
| RAS_SIGNALING | MDD4a_sleepProb [ACC_BA24] | 123 | -2.208 | — | 0.09625 |
| SYNAPTIC_VESICLE_CYCLE | MDD5a_psychomotorFast [Amygdala] | 32 | -2.065 | — | 0.09839 |
| SYNAPTIC_VESICLE_CYCLE | MDD1_depressed | 58 | -2.891 | 0.103 | 0.2632 |
| NEUROACTIVE_LIGAND_REC | MDD6_fatigue [Hippocampus] | 139 | 2.062 | — | 0.1041 |
| AUTOPHAGY_ANIMAL | MDD2_anhedonia | 140 | 2.755 | 0.1252 | 0.2105 |
| PPAR_SIGNALING | MDD9_death | 60 | -2.724 | 0.1257 | 0.2081 |
| CITRATE_CYCLE_TCA | MDD1_depressed | 26 | 2.674 | 0.1302 | 0.05252 |
| FATTY_ACID_DEGRADATION | MDD8_concentration [Nuc_accumbens] | 29 | -2.019 | — | 0.1316 |
| AUTOPHAGY_ANIMAL | MDD3a_weightLoss [Caudate] | 111 | -2.234 | — | 0.1335 |
| MAPK_SIGNALING | MDD5b_psychomotorSlow | 222 | -2.501 | 0.1486 | 0.08587 |
| REG_ACTIN_CYTOSKELETON | MDD3a_weightLoss | 179 | -2.590 | 0.1503 | 0.203 |
| FATTY_ACID_DEGRADATION | MDD9_death | 35 | 2.497 | 0.159 | 0.2318 |
| SYNAPTIC_VESICLE_CYCLE | MDD8_concentration | 58 | -2.493 | 0.1623 | 0.305 |
| MAPK_SIGNALING | MDD8_concentration | 222 | -2.483 | 0.1629 | 0.2826 |
| RAS_SIGNALING | MDD4b_sleepMore | 171 | 2.455 | 0.1816 | 0.2374 |
| ENDOCYTOSIS | MDD1_depressed | 212 | 2.289 | 0.188 | 0.3544 |
| FATTY_ACID_DEGRADATION | MDD1_depressed [ACC_BA24] | 26 | -1.970 | — | 0.1899 |
| PPAR_SIGNALING | MDD7_worthless | 60 | -2.382 | 0.1909 | 0.1313 |
| RAS_SIGNALING | MDD3b_weightGain | 171 | 2.366 | 0.1921 | 0.06782 |
| CITRATE_CYCLE_TCA | MDD5a_psychomotorFast | 26 | 2.315 | 0.1942 | 0.2079 |
| PPAR_SIGNALING | MDD3b_weightGain | 60 | 2.288 | 0.1995 | 0.2002 |
| FATTY_ACID_DEGRADATION | MDD5b_psychomotorSlow | 35 | -2.209 | 0.2059 | 0.3855 |
| REG_ACTIN_CYTOSKELETON | MDD4b_sleepMore | 177 | -2.297 | 0.2087 | 0.1755 |
| SYNAPTIC_VESICLE_CYCLE | MDD5a_psychomotorFast | 58 | -2.197 | 0.2147 | 0.4597 |
| PPAR_SIGNALING | MDD5b_psychomotorSlow | 60 | -2.167 | 0.2187 | 0.1491 |
| SYNAPTIC_VESICLE_CYCLE | MDD4b_sleepMore | 58 | 2.190 | 0.2237 | 0.08218 |
| FATTY_ACID_DEGRADATION | MDD4b_sleepMore | 35 | 2.155 | 0.2313 | 0.4128 |
| REG_ACTIN_CYTOSKELETON | MDD8_concentration | 179 | 2.133 | 0.2313 | 0.203 |
| REG_ACTIN_CYTOSKELETON | MDD9_death | 179 | 2.181 | 0.2316 | 0.1733 |
| RAS_SIGNALING | MDD8_concentration | 170 | -2.122 | 0.2324 | 0.3953 |
| MAPK_SIGNALING | MDD4a_sleepProb | 222 | -2.111 | 0.2415 | 0.2171 |
| RAS_SIGNALING | MDD5a_psychomotorFast | 171 | 2.078 | 0.2424 | 0.496 |
| NEUROACTIVE_LIGAND_REC | MDD4b_sleepMore | 246 | -2.130 | 0.2501 | 0.1495 |
| REG_ACTIN_CYTOSKELETON | MDD5a_psychomotorFast | 177 | 1.999 | 0.2662 | 0.471 |
| RAS_SIGNALING | MDD6_fatigue | 168 | 1.962 | 0.2693 | 0.28 |
| *Rows 1–104 of the 110 retained findings shown above in ascending Wilcoxon-p / descending |Z| order; remaining 6 borderline meta entries fall below |Z| 1.96 after FDR filtering and are captured in Table A7/A8.* | | | | | |

REG_ACTIN_CYTOSKELETON = KEGG_REGULATION_OF_ACTIN_CYTOSKELETON; NEUROACTIVE_LIGAND_REC = KEGG_NEUROACTIVE_LIGAND_RECEPTOR_INTERACTION; ACC_BA24 = Anterior_cingulate_cortex_BA24. Green = positive Z; red = negative Z.

## **A4 | Differential tests (Kruskal–Wallis + pairwise; 17 pairs)**

| **Gene-set** | **Comparison** | **mean Z diff** | **MWU p** | **MWU FDR** | **PairedW p** | **RBC** |
| --- | --- | --- | --- | --- | --- | --- |
| ENDOCYTOSIS | MDD4b_sleepMore vs MDD3b_weightGain | -0.689 | 5.8e-05 | 0.00383 | 7e-06 | 0.227 |
| FATTY_ACID_DEGRAD | MDD7_worthless vs MDD3b_weightGain | -1.488 | 1.63e-04 | 0.01076 | 1.51e-04 | 0.525 |
| ENDOCYTOSIS | MDD1_depressed vs MDD4b_sleepMore | 0.602 | 0.00141 | 0.02445 | 0.00437 | -0.180 |
| ENDOCYTOSIS | MDD4b_sleepMore vs MDD3a_weightLoss | -0.559 | 0.00124 | 0.02445 | 0.00690 | 0.183 |
| ENDOCYTOSIS | MDD4b_sleepMore vs MDD5b_psychomotorSlow | -0.533 | 0.00148 | 0.02445 | 0.00198 | 0.180 |
| ENDOCYTOSIS | MDD2_anhedonia vs MDD4b_sleepMore | 0.540 | 0.00311 | 0.03424 | 0.00305 | -0.167 |
| ENDOCYTOSIS | MDD4b_sleepMore vs MDD7_worthless | -0.512 | 0.00301 | 0.03424 | 0.00218 | 0.168 |
| AUTOPHAGY_ANIMAL | MDD3a_weightLoss vs MDD3b_weightGain | -0.774 | 6.75e-04 | 0.04455 | 0.00314 | 0.235 |
| FATTY_ACID_DEGRAD | MDD2_anhedonia vs MDD3b_weightGain | -1.115 | 0.00431 | 0.07863 | 0.01013 | 0.398 |
| FATTY_ACID_DEGRAD | MDD4b_sleepMore vs MDD7_worthless | 1.220 | 0.00620 | 0.07863 | 0.0166 | -0.381 |
| FATTY_ACID_DEGRAD | MDD7_worthless vs MDD5a_psychomotorFast | -1.094 | 0.00690 | 0.07863 | 0.00427 | 0.376 |
| FATTY_ACID_DEGRAD | MDD7_worthless vs MDD9_death | -1.277 | 0.00482 | 0.07863 | 0.01013 | 0.393 |
| FATTY_ACID_DEGRAD | MDD8_concentration vs MDD3b_weightGain | -1.343 | 0.00715 | 0.07863 | 0.00535 | 0.375 |
| FATTY_ACID_DEGRAD | MDD7_worthless vs MDD3a_weightLoss | -0.859 | 0.0171 | 0.1613 | 0.01066 | 0.332 |
| FATTY_ACID_DEGRAD | MDD4a_sleepProb vs MDD3b_weightGain | -0.929 | 0.02891 | 0.2085 | 0.05787 | 0.304 |
| FATTY_ACID_DEGRAD | MDD6_fatigue vs MDD7_worthless | 1.010 | 0.03067 | 0.2085 | 0.01741 | -0.301 |
| CITRATE_CYCLE_TCA | MDD1_depressed vs MDD7_worthless | 0.570 | 0.05351 | 0.8833 | 0.08903 | -0.314 |

## **A5 | Profile proximity (Pearson / Spearman; 51 pairs)**

| **Gene-set** | **Symptom pair** | **n** | **r** | **ρ** | **cos** |
| --- | --- | --- | --- | --- | --- |
| ENDOCYTOSIS | MDD1_depressed vs MDD2_anhedonia | 209 | 0.453 | 0.338 | 0.457 |
| MAPK_SIGNALING | MDD1_depressed vs MDD2_anhedonia | 220 | 0.385 | 0.295 | 0.388 |
| NEUROACT_LIG_REC | MDD1_depressed vs MDD2_anhedonia | 242 | 0.383 | 0.357 | 0.376 |
| NEUROACT_LIG_REC | MDD3a_weightLoss vs MDD3b_weightGain | 242 | -0.404 | -0.394 | -0.404 |
| RAS_SIGNALING | MDD1_depressed vs MDD2_anhedonia | 168 | 0.375 | 0.328 | 0.375 |
| RAS_SIGNALING | MDD3a_weightLoss vs MDD3b_weightGain | 168 | -0.374 | -0.368 | -0.379 |
| AUTOPHAGY_ANIMAL | MDD1_depressed vs MDD2_anhedonia | 140 | 0.369 | 0.341 | 0.370 |
| AUTOPHAGY_ANIMAL | MDD6_fatigue vs MDD8_concentration | 140 | 0.362 | 0.347 | 0.363 |
| MAPK_SIGNALING | MDD3a_weightLoss vs MDD3b_weightGain | 220 | -0.288 | -0.301 | -0.288 |
| REG_ACTIN_CYTOSK | MDD1_depressed vs MDD2_anhedonia | 176 | 0.316 | 0.234 | 0.323 |
| REG_ACTIN_CYTOSK | MDD3a_weightLoss vs MDD3b_weightGain | 176 | -0.301 | -0.292 | -0.293 |
| RAS_SIGNALING | MDD4b_sleepMore vs MDD3b_weightGain | 168 | 0.297 | 0.314 | 0.308 |
| AUTOPHAGY_ANIMAL | MDD1_depressed vs MDD6_fatigue | 140 | 0.315 | 0.289 | 0.317 |
| SYNAPTIC_VESICLE | MDD1_depressed vs MDD2_anhedonia | 58 | 0.474 | 0.485 | 0.462 |
| SYNAPTIC_VESICLE | MDD3a_weightLoss vs MDD3b_weightGain | 58 | -0.453 | -0.418 | -0.451 |
| FATTY_ACID_DEGRAD | MDD4a_sleepProb vs MDD6_fatigue | 35 | 0.565 | 0.286 | 0.548 |
| SYNAPTIC_VESICLE | MDD1_depressed vs MDD8_concentration | 58 | 0.447 | 0.274 | 0.474 |
| AUTOPHAGY_ANIMAL | MDD3a_weightLoss vs MDD3b_weightGain | 140 | -0.274 | -0.323 | -0.298 |
| PPAR_SIGNALING | MDD5a_psychomotorFast vs MDD5b_psychomotorSlow | 60 | 0.392 | 0.213 | 0.370 |
| PPAR_SIGNALING | MDD1_depressed vs MDD2_anhedonia | 60 | 0.390 | 0.416 | 0.393 |
| CITRATE_CYCLE_TCA | MDD7_worthless vs MDD5a_psychomotorFast | 26 | 0.574 | 0.322 | 0.545 |
| PPAR_SIGNALING | MDD4a_sleepProb vs MDD5a_psychomotorFast | 60 | 0.384 | 0.397 | 0.383 |
| PPAR_SIGNALING | MDD7_worthless vs MDD8_concentration | 60 | 0.373 | 0.227 | 0.347 |
| SYNAPTIC_VESICLE | MDD4a_sleepProb vs MDD3a_weightLoss | 58 | 0.374 | 0.411 | 0.378 |
| PPAR_SIGNALING | MDD4b_sleepMore vs MDD5a_psychomotorFast | 60 | -0.362 | -0.262 | -0.354 |
| CITRATE_CYCLE_TCA | MDD1_depressed vs MDD5a_psychomotorFast | 26 | 0.534 | 0.571 | 0.577 |
| FATTY_ACID_DEGRAD | MDD4a_sleepProb vs MDD8_concentration | 35 | 0.459 | 0.364 | 0.473 |
| CITRATE_CYCLE_TCA | MDD4b_sleepMore vs MDD5b_psychomotorSlow | 26 | 0.515 | 0.427 | 0.504 |
| FATTY_ACID_DEGRAD | MDD4b_sleepMore vs MDD8_concentration | 35 | -0.434 | -0.355 | -0.459 |
| PPAR_SIGNALING | MDD4a_sleepProb vs MDD4b_sleepMore | 60 | -0.332 | -0.321 | -0.331 |
| FATTY_ACID_DEGRAD | MDD1_depressed vs MDD6_fatigue | 35 | 0.431 | 0.452 | 0.401 |
| PPAR_SIGNALING | MDD3a_weightLoss vs MDD3b_weightGain | 60 | -0.322 | -0.304 | -0.313 |
| FATTY_ACID_DEGRAD | MDD6_fatigue vs MDD8_concentration | 35 | 0.413 | 0.317 | 0.363 |
| PPAR_SIGNALING | MDD1_depressed vs MDD7_worthless | 60 | 0.317 | 0.274 | 0.322 |
| SYNAPTIC_VESICLE | MDD2_anhedonia vs MDD8_concentration | 58 | 0.317 | 0.303 | 0.309 |
| PPAR_SIGNALING | MDD4b_sleepMore vs MDD8_concentration | 60 | -0.308 | -0.276 | -0.302 |
| SYNAPTIC_VESICLE | MDD2_anhedonia vs MDD4b_sleepMore | 58 | 0.311 | 0.317 | 0.307 |
| SYNAPTIC_VESICLE | MDD6_fatigue vs MDD2_anhedonia | 58 | 0.308 | 0.132 | 0.308 |
| FATTY_ACID_DEGRAD | MDD3a_weightLoss vs MDD3b_weightGain | 35 | -0.385 | -0.350 | -0.357 |
| PPAR_SIGNALING | MDD2_anhedonia vs MDD8_concentration | 60 | 0.293 | 0.300 | 0.280 |
| FATTY_ACID_DEGRAD | MDD1_depressed vs MDD8_concentration | 35 | 0.383 | 0.230 | 0.428 |
| FATTY_ACID_DEGRAD | MDD2_anhedonia vs MDD5a_psychomotorFast | 35 | 0.350 | 0.397 | 0.294 |
| CITRATE_CYCLE_TCA | MDD4a_sleepProb vs MDD5a_psychomotorFast | 26 | 0.398 | 0.218 | 0.347 |
| CITRATE_CYCLE_TCA | MDD1_depressed vs MDD2_anhedonia | 26 | 0.398 | 0.376 | 0.433 |
| FATTY_ACID_DEGRAD | MDD1_depressed vs MDD4a_sleepProb | 35 | 0.334 | 0.451 | 0.353 |
| SYNAPTIC_VESICLE | MDD7_worthless vs MDD5a_psychomotorFast | 58 | -0.244 | -0.324 | -0.221 |
| CITRATE_CYCLE_TCA | MDD8_concentration vs MDD5b_psychomotorSlow | 26 | 0.352 | 0.397 | 0.365 |
| PPAR_SIGNALING | MDD6_fatigue vs MDD9_death | 60 | 0.223 | 0.329 | 0.228 |
| FATTY_ACID_DEGRAD | MDD4a_sleepProb vs MDD2_anhedonia | 35 | 0.268 | 0.366 | 0.293 |
| CITRATE_CYCLE_TCA | MDD4a_sleepProb vs MDD3b_weightGain | 26 | -0.285 | -0.430 | -0.269 |
| CITRATE_CYCLE_TCA | MDD7_worthless vs MDD9_death | 26 | 0.283 | 0.398 | 0.285 |

## **A6 | Pairwise disease statistical tests (18 comparisons)**

| **Gene-set** | **Comparison** | **n paired** | **mean diff** | **d (paired)** | **d (unpaired)** |
| --- | --- | --- | --- | --- | --- |
| ENDOCYTOSIS | MDD4b_sleepMore vs MDD3b_weightGain | 212 | -0.690 | -0.32 | -0.44 |
| FATTY_ACID_DEGRAD | MDD7_worthless vs MDD3b_weightGain | 35 | -1.488 | -0.74 | -0.92 |
| FATTY_ACID_DEGRAD | MDD1_depressed vs MDD3b_weightGain | 35 | -1.149 | -0.41 | -0.61 |
| FATTY_ACID_DEGRAD | MDD4a_sleepProb vs MDD3b_weightGain | 35 | -0.929 | -0.36 | -0.52 |
| FATTY_ACID_DEGRAD | MDD6_fatigue vs MDD7_worthless | 35 | 1.010 | 0.41 | 0.56 |
| FATTY_ACID_DEGRAD | MDD2_anhedonia vs MDD3b_weightGain | 35 | -1.115 | -0.47 | -0.73 |
| FATTY_ACID_DEGRAD | MDD4b_sleepMore vs MDD7_worthless | 35 | 1.220 | 0.40 | 0.64 |
| FATTY_ACID_DEGRAD | MDD4b_sleepMore vs MDD8_concentration | 35 | 1.075 | 0.31 | 0.52 |
| FATTY_ACID_DEGRAD | MDD7_worthless vs MDD3a_weightLoss | 35 | -0.859 | -0.40 | -0.57 |
| FATTY_ACID_DEGRAD | MDD7_worthless vs MDD5a_psychomotorFast | 35 | -1.094 | -0.44 | -0.67 |
| FATTY_ACID_DEGRAD | MDD7_worthless vs MDD9_death | 35 | -1.277 | -0.47 | -0.67 |
| FATTY_ACID_DEGRAD | MDD5a_psychomotorFast vs MDD8_concentration | 35 | 0.949 | 0.34 | 0.52 |
| FATTY_ACID_DEGRAD | MDD8_concentration vs MDD3b_weightGain | 35 | -1.343 | -0.53 | -0.76 |
| FATTY_ACID_DEGRAD | MDD8_concentration vs MDD9_death | 35 | -1.132 | -0.38 | -0.54 |
| FATTY_ACID_DEGRAD | MDD3b_weightGain vs MDD5b_psychomotorSlow | 35 | 0.979 | 0.42 | 0.51 |
| CITRATE_CYCLE_TCA | MDD1_depressed vs MDD4a_sleepProb | 26 | 0.692 | 0.41 | 0.56 |
| CITRATE_CYCLE_TCA | MDD1_depressed vs MDD3a_weightLoss | 26 | 0.891 | 0.38 | 0.58 |
| CITRATE_CYCLE_TCA | MDD1_depressed vs MDD9_death | 26 | 0.727 | 0.38 | 0.56 |

## **A7 | Concordance metrics (sign / Lin's CCC / Kendall τ; 6 pairs)**

| **Gene-set** | **Comparison** | **n paired** | **sign rate** | **Lin CCC** | **Kendall τ** | **τ p** |
| --- | --- | --- | --- | --- | --- | --- |
| SYNAPTIC_VESICLE | MDD1_depressed vs MDD2_anhedonia | 58 | 0.707 | 0.461 | 0.344 | 1.35e-04 |
| PPAR_SIGNALING | MDD6_fatigue vs MDD9_death | 60 | 0.733 | 0.217 | 0.233 | 0.00860 |
| CITRATE_CYCLE_TCA | MDD1_depressed vs MDD5a_psychomotorFast | 26 | 0.769 | 0.506 | 0.434 | 0.00155 |
| FATTY_ACID_DEGRAD | MDD1_depressed vs MDD4a_sleepProb | 35 | 0.714 | 0.333 | 0.361 | 0.00226 |
| CITRATE_CYCLE_TCA | MDD7_worthless vs MDD5a_psychomotorFast | 26 | 0.462 | 0.548 | 0.249 | 0.07769 |
| FATTY_ACID_DEGRAD | MDD4a_sleepProb vs MDD6_fatigue | 35 | 0.543 | 0.550 | 0.207 | 0.08068 |

## **A8 | Recurrent driver genes (leave-one-out influence)**

*From 3,703 influential gene–disease entries; 612 leave-one-out cases flip the meta direction. Full per-gene LOO listings are retained in the source CSV (multi_geneset_gene_influence.csv) and are too large to tabulate here.*

**Table A8a.** Top single-gene leave-one-out effects (largest |Δ Stouffer| / % change).

| **Gene-set** | **Symptom** | ***Gene*** | **Δ Stouffer** | **% change** | **Sign flip** |
| --- | --- | --- | --- | --- | --- |
| FATTY_ACID_DEGRAD | MDD3a_weightLoss | *ACAT1* | -0.765 | 29917.8 | *yes* |
| FATTY_ACID_DEGRAD | MDD3a_weightLoss | *ACADS* | 0.561 | 21949.4 | no |
| FATTY_ACID_DEGRAD | MDD3a_weightLoss | *ACSBG1* | 0.426 | 16670.0 | no |
| FATTY_ACID_DEGRAD | MDD3a_weightLoss | *ACADM* | 0.416 | 16256.5 | no |
| FATTY_ACID_DEGRAD | MDD3a_weightLoss | *ADH1C* | 0.391 | 15290.0 | no |
| FATTY_ACID_DEGRAD | MDD3a_weightLoss | *CPT1A* | 0.365 | 14263.1 | no |
| FATTY_ACID_DEGRAD | MDD3a_weightLoss | *ACOX1* | -0.301 | 11770.5 | *yes* |
| FATTY_ACID_DEGRAD | MDD3a_weightLoss | *HADHB* | -0.298 | 11636.1 | *yes* |
| MAPK_SIGNALING | MDD3b_weightGain | *CACNA1D* | -0.460 | 11098.7 | no |
| FATTY_ACID_DEGRAD | MDD3a_weightLoss | *ECI2* | -0.279 | 10897.7 | *yes* |
| FATTY_ACID_DEGRAD | MDD3a_weightLoss | *ACSL5* | -0.268 | 10485.8 | *yes* |
| FATTY_ACID_DEGRAD | MDD3a_weightLoss | *ALDH3A2* | -0.247 | 9649.2 | *yes* |
| FATTY_ACID_DEGRAD | MDD3a_weightLoss | *ACADSB* | -0.236 | 9244.5 | *yes* |
| SYNAPTIC_VESICLE | MDD2_anhedonia | *CLTA* | 0.665 | 9219.7 | *yes* |
| FATTY_ACID_DEGRAD | MDD3a_weightLoss | *ACADVL* | 0.226 | 8825.6 | no |
| FATTY_ACID_DEGRAD | MDD3a_weightLoss | *GCDH* | -0.222 | 8669.8 | *yes* |
| FATTY_ACID_DEGRAD | MDD3a_weightLoss | *ACAT2* | -0.219 | 8557.2 | *yes* |
| FATTY_ACID_DEGRAD | MDD3a_weightLoss | *ACSL6* | 0.206 | 8072.9 | no |
| FATTY_ACID_DEGRAD | MDD3a_weightLoss | *ACOX3* | 0.199 | 7767.5 | no |
| SYNAPTIC_VESICLE | MDD2_anhedonia | *ATP6V1D* | -0.553 | 7665.6 | no |

**Table A8b.** Most recurrent driver genes across pathway–symptom combinations.

| ***Gene*** | **n combos** | **mean |Δ|** | ***Gene*** | **n combos** | **mean |Δ|** |
| --- | --- | --- | --- | --- | --- |
| *HRAS* | 16 | 0.196 | *RAF1* | 10 | 0.155 |
| *MAP2K2* | 13 | 0.196 | *CDC42* | 10 | 0.104 |
| *RAB7A* | 11 | 0.259 | *TBK1* | 10 | 0.282 |
| *RRAS2* | 11 | 0.222 | *CPT1B* | 10 | 0.437 |
| *MAPK3* | 11 | 0.208 | *AKT3* | 10 | 0.172 |
| *PCK2* | 11 | 0.499 | *HSPA1B* | 10 | 0.171 |
| *MAPK10* | 11 | 0.213 | *CLTCL1* | 10 | 0.195 |
| *MAPK1* | 11 | 0.201 | *PCK1* | 9 | 0.237 |
| *ACSBG1* | 11 | 0.417 | *AP2A2* | 9 | 0.219 |
| *PIK3R1* | 10 | 0.187 | *RAC1* | 9 | 0.203 |

## **A9 | Pathway-symptom network — highest-degree hubs**

| **Node** | **Degree** | **Node** | **Degree** | **Node** | **Degree** |
| --- | --- | --- | --- | --- | --- |
| FATTY_ACID_DEGRADATION | 8 | MAPK_SIGNALING | 5 | PPAR_SIGNALING | 4 |
| REG_ACTIN_CYTOSKELETON | 6 | MDD8_concentration | 5 | MDD5a_psychomotorFast | 4 |
| MDD4b_sleepMore | 6 | MDD2_anhedonia | 5 | MDD1_depressed | 4 |
| MDD3b_weightGain | 5 | SYNAPTIC_VESICLE_CYCLE | 4 | AUTOPHAGY_ANIMAL | 3 |
| RAS_SIGNALING | 5 | ENDOCYTOSIS | 3 | MDD7_worthless | 3 |

## **A10 | Opposing symptom-dimension comparison**

**Table A10a.** weightLoss (MDD3a) vs weightGain (MDD3b) — verdict: DIVERGENT (mean sign-concordance 0.377; mean Lin CCC −0.321).

| **Gene-set** | **mean diff** | **d paired** | **sign-conc.** | **Lin CCC** | **Kendall τ** |
| --- | --- | --- | --- | --- | --- |
| ENDOCYTOSIS | -0.143 | -0.053 | 0.372 | -0.269 | -0.209 |
| FATTY_ACID_DEGRADATION | -0.629 | -0.249 | 0.400 | -0.356 | -0.244 |
| MAPK_SIGNALING | 0.008 | 0.003 | 0.380 | -0.293 | -0.211 |
| RAS_SIGNALING | -0.283 | -0.097 | 0.373 | -0.376 | -0.261 |
| PPAR_SIGNALING | -0.258 | -0.085 | 0.400 | -0.310 | -0.222 |
| NEUROACTIVE_LIGAND_REC | 0.069 | 0.029 | 0.338 | -0.408 | -0.279 |
| REG_ACTIN_CYTOSKELETON | -0.154 | -0.060 | 0.392 | -0.299 | -0.199 |
| CITRATE_CYCLE_TCA | -0.206 | -0.085 | 0.423 | -0.192 | -0.089 |
| AUTOPHAGY_ANIMAL | -0.774 | -0.260 | 0.345 | -0.252 | -0.226 |
| SYNAPTIC_VESICLE_CYCLE | -0.184 | -0.059 | 0.345 | -0.451 | -0.297 |

**Table A10b.** psychomotorFast (MDD5a) vs psychomotorSlow (MDD5b) — verdict: WEAKLY RELATED (mean sign-concordance 0.493; mean Lin CCC −0.014).

| **Gene-set** | **mean diff** | **d paired** | **sign-conc.** | **Lin CCC** | **Kendall τ** |
| --- | --- | --- | --- | --- | --- |
| ENDOCYTOSIS | -0.085 | -0.032 | 0.493 | 0.041 | 0.013 |
| FATTY_ACID_DEGRADATION | 0.585 | 0.220 | 0.571 | 0.055 | 0.029 |
| MAPK_SIGNALING | 0.169 | 0.081 | 0.468 | -0.066 | -0.043 |
| RAS_SIGNALING | 0.224 | 0.097 | 0.529 | 0.037 | 0.045 |
| PPAR_SIGNALING | 0.524 | 0.223 | 0.567 | 0.374 | 0.150 |
| NEUROACTIVE_LIGAND_REC | 0.040 | 0.024 | 0.544 | -0.007 | 0.033 |
| REG_ACTIN_CYTOSKELETON | 0.240 | 0.092 | 0.426 | -0.174 | -0.117 |
| CITRATE_CYCLE_TCA | 0.228 | 0.092 | 0.423 | -0.329 | -0.255 |
| AUTOPHAGY_ANIMAL | -0.065 | -0.018 | 0.475 | -0.076 | -0.036 |
| SYNAPTIC_VESICLE_CYCLE | -0.294 | -0.129 | 0.431 | 0.001 | -0.031 |

## **A11 | Robustness across thresholds**

| **|Z| threshold** | **p threshold** | **n significant** |
| --- | --- | --- |
| 1.960 | 0.050 | 8 |
| 2.500 | 0.010 | 3 |
| 3.000 | 0.005 | 3 |
| 3.290 | 0.001 | 2 |

## **A12 | Strongest individual gene-set × symptom associations (bootstrap CIs)**

| **Gene-set** | **Symptom** | **Stouffer Z** | **CI low** | **CI high** | **perm p** | **cov %** |
| --- | --- | --- | --- | --- | --- | --- |
| ENDOCYTOSIS | MDD4b_sleepMore | -6.416 | -9.667 | -3.022 | 0.0004 | 84.8 |
| AUTOPHAGY_ANIMAL | MDD3a_weightLoss | -5.929 | -9.965 | -1.936 | 0.0008 | 82.8 |
| FATTY_ACID_DEGRAD | MDD7_worthless | -5.248 | -8.722 | -2.102 | 0.0037 | 81.4 |
| NEUROACTIVE_LIGAND_REC | MDD2_anhedonia | -4.245 | -7.506 | -1.060 | 0.0192 | 66.6 |
| FATTY_ACID_DEGRAD | MDD8_concentration | -4.068 | -7.860 | -0.322 | 0.0224 | 81.4 |
| ENDOCYTOSIS | MDD3b_weightGain | 3.987 | 0.985 | 6.860 | 0.0239 | 84.8 |
| FATTY_ACID_DEGRAD | MDD3b_weightGain | 3.797 | 0.643 | 6.975 | 0.0360 | 81.4 |
| MAPK_SIGNALING | MDD7_worthless | -3.590 | -6.873 | -0.326 | 0.0482 | 74.3 |
| REG_ACTIN_CYTOSK | MDD2_anhedonia | 3.504 | 0.371 | 6.635 | 0.0560 | 77.2 |
| AUTOPHAGY_ANIMAL | MDD3b_weightGain | 3.226 | -0.135 | 6.713 | 0.0711 | 82.8 |
| MAPK_SIGNALING | MDD2_anhedonia | -3.112 | -6.705 | 0.317 | 0.0909 | 74.0 |
| FATTY_ACID_DEGRAD | MDD2_anhedonia | -3.016 | -6.038 | 0.309 | 0.0868 | 81.4 |
| FATTY_ACID_DEGRAD | MDD1_depressed | -2.909 | -7.319 | 1.096 | 0.0935 | 81.4 |
| SYNAPTIC_VESICLE | MDD1_depressed | -2.891 | -6.069 | 0.009 | 0.1030 | 73.4 |
| AUTOPHAGY_ANIMAL | MDD2_anhedonia | 2.755 | -0.624 | 6.178 | 0.1252 | 82.8 |
| PPAR_SIGNALING | MDD9_death | -2.724 | -6.791 | 1.148 | 0.1257 | 78.9 |
| CITRATE_CYCLE_TCA | MDD1_depressed | 2.674 | 0.345 | 5.067 | 0.1302 | 86.7 |
| REG_ACTIN_CYTOSK | MDD3a_weightLoss | -2.590 | -5.641 | 0.396 | 0.1503 | 77.2 |
| MAPK_SIGNALING | MDD5b_psychomotorSlow | -2.501 | -5.563 | 0.559 | 0.1486 | 74.0 |
| FATTY_ACID_DEGRAD | MDD9_death | 2.497 | -1.743 | 6.677 | 0.1590 | 81.4 |

## **A13 | Per-gene-set Stouffer Z across all 12 symptoms (publication tables)**

*Each sub-table reports meta-across-tissue Stouffer Z, 95% bootstrap CI, permutation p and coverage for every symptom dimension.*

### **A13.1 KEGG_AUTOPHAGY_ANIMAL**

| **Symptom** | **Z** | **CI low** | **CI high** | **perm p** | **cov %** |
| --- | --- | --- | --- | --- | --- |
| MDD3a_weightLoss | -5.929 | -9.965 | -1.936 | 0.0008 | 82.8 |
| MDD3b_weightGain | 3.226 | -0.135 | 6.713 | 0.0711 | 82.8 |
| MDD2_anhedonia | 2.755 | -0.624 | 6.178 | 0.1252 | 82.8 |
| MDD6_fatigue | 1.620 | -2.123 | 5.323 | 0.3660 | 82.8 |
| MDD4b_sleepMore | 1.126 | -2.172 | 4.509 | 0.5350 | 82.8 |
| MDD4a_sleepProb | -0.900 | -4.328 | 2.502 | 0.6213 | 82.8 |
| MDD5a_psychomotorFast | -0.804 | -4.388 | 2.894 | 0.6457 | 82.8 |
| MDD1_depressed | 0.778 | -2.983 | 4.520 | 0.6572 | 82.8 |
| MDD7_worthless | 0.675 | -2.933 | 4.256 | 0.7078 | 82.8 |
| MDD8_concentration | 0.599 | -3.035 | 4.235 | 0.7355 | 82.8 |
| MDD9_death | 0.462 | -2.975 | 3.795 | 0.7908 | 82.8 |
| MDD5b_psychomotorSlow | -0.230 | -3.629 | 3.189 | 0.8912 | 82.8 |

### **A13.2 KEGG_CITRATE_CYCLE_TCA_CYCLE**

| **Symptom** | **Z** | **CI low** | **CI high** | **perm p** | **cov %** |
| --- | --- | --- | --- | --- | --- |
| MDD1_depressed | 2.674 | 0.345 | 5.067 | 0.1302 | 86.7 |
| MDD5a_psychomotorFast | 2.315 | -0.824 | 5.441 | 0.1942 | 86.7 |
| MDD3a_weightLoss | -1.854 | -5.357 | 1.608 | 0.3021 | 86.7 |
| MDD2_anhedonia | 1.757 | -1.780 | 5.301 | 0.3175 | 86.7 |
| MDD5b_psychomotorSlow | 1.145 | -1.763 | 3.765 | 0.5174 | 86.7 |
| MDD8_concentration | 1.096 | -1.987 | 4.003 | 0.5359 | 86.7 |
| MDD9_death | -1.051 | -3.690 | 1.683 | 0.5551 | 86.7 |
| MDD6_fatigue | 1.008 | -2.236 | 4.071 | 0.5696 | 86.7 |
| MDD4a_sleepProb | -0.920 | -3.292 | 1.483 | 0.5976 | 86.7 |
| MDD3b_weightGain | -0.742 | -3.805 | 2.093 | 0.6780 | 86.7 |
| MDD7_worthless | -0.374 | -3.126 | 2.582 | 0.8350 | 86.7 |
| MDD4b_sleepMore | -0.121 | -4.378 | 3.882 | 0.9491 | 86.7 |

### **A13.3 KEGG_ENDOCYTOSIS**

| **Symptom** | **Z** | **CI low** | **CI high** | **perm p** | **cov %** |
| --- | --- | --- | --- | --- | --- |
| MDD4b_sleepMore | -6.416 | -9.667 | -3.022 | 0.0004 | 84.8 |
| MDD3b_weightGain | 3.987 | 0.985 | 6.860 | 0.0239 | 84.8 |
| MDD1_depressed | 2.289 | -1.017 | 5.898 | 0.1880 | 84.8 |
| MDD3a_weightLoss | 1.757 | -2.041 | 5.387 | 0.3230 | 84.4 |
| MDD5b_psychomotorSlow | 1.575 | -1.596 | 4.935 | 0.3700 | 84.8 |
| MDD7_worthless | 1.344 | -1.972 | 4.515 | 0.4573 | 84.0 |
| MDD2_anhedonia | 1.217 | -2.033 | 4.437 | 0.5131 | 85.2 |
| MDD8_concentration | -0.962 | -4.269 | 2.440 | 0.5874 | 84.4 |
| MDD5a_psychomotorFast | 0.495 | -2.872 | 3.939 | 0.7783 | 84.8 |
| MDD9_death | 0.270 | -2.976 | 3.446 | 0.8779 | 85.2 |
| MDD6_fatigue | 0.033 | -3.360 | 3.340 | 0.9866 | 84.0 |
| MDD4a_sleepProb | -0.006 | -3.307 | 3.308 | 0.9972 | 84.8 |

### **A13.4 KEGG_FATTY_ACID_DEGRADATION**

| **Symptom** | **Z** | **CI low** | **CI high** | **perm p** | **cov %** |
| --- | --- | --- | --- | --- | --- |
| MDD7_worthless | -5.248 | -8.722 | -2.102 | 0.0037 | 81.4 |
| MDD8_concentration | -4.068 | -7.860 | -0.322 | 0.0224 | 81.4 |
| MDD3b_weightGain | 3.797 | 0.643 | 6.975 | 0.0360 | 81.4 |
| MDD2_anhedonia | -3.016 | -6.038 | 0.309 | 0.0868 | 81.4 |
| MDD1_depressed | -2.909 | -7.319 | 1.096 | 0.0935 | 81.4 |
| MDD9_death | 2.497 | -1.743 | 6.677 | 0.1590 | 81.4 |
| MDD5b_psychomotorSlow | -2.209 | -6.522 | 2.372 | 0.2059 | 81.4 |
| MDD4b_sleepMore | 2.155 | -2.044 | 6.231 | 0.2313 | 81.4 |
| MDD4a_sleepProb | -1.907 | -5.882 | 1.919 | 0.2811 | 81.4 |
| MDD5a_psychomotorFast | 1.449 | -1.707 | 4.503 | 0.4156 | 81.4 |
| MDD6_fatigue | 0.879 | -2.702 | 4.752 | 0.6219 | 81.4 |
| MDD3a_weightLoss | 0.108 | -2.829 | 2.914 | 0.9540 | 81.4 |

### **A13.5 KEGG_MAPK_SIGNALING_PATHWAY**

| **Symptom** | **Z** | **CI low** | **CI high** | **perm p** | **cov %** |
| --- | --- | --- | --- | --- | --- |
| MDD7_worthless | -3.590 | -6.873 | -0.326 | 0.0482 | 74.3 |
| MDD2_anhedonia | -3.112 | -6.705 | 0.317 | 0.0909 | 74.0 |
| MDD5b_psychomotorSlow | -2.501 | -5.563 | 0.559 | 0.1486 | 74.0 |
| MDD8_concentration | -2.483 | -5.437 | 0.760 | 0.1629 | 74.0 |
| MDD4a_sleepProb | -2.111 | -5.050 | 0.863 | 0.2415 | 74.0 |
| MDD9_death | -1.485 | -4.467 | 1.384 | 0.4051 | 74.3 |
| MDD6_fatigue | 1.423 | -1.466 | 4.454 | 0.4189 | 73.3 |
| MDD1_depressed | -1.203 | -4.702 | 1.967 | 0.4890 | 74.0 |
| MDD4b_sleepMore | 0.250 | -2.647 | 2.954 | 0.8909 | 74.0 |
| MDD3a_weightLoss | 0.246 | -3.139 | 3.560 | 0.8904 | 74.0 |
| MDD5a_psychomotorFast | 0.188 | -2.703 | 3.062 | 0.9109 | 74.0 |
| MDD3b_weightGain | 0.134 | -2.976 | 3.316 | 0.9408 | 74.0 |

### **A13.6 KEGG_NEUROACTIVE_LIGAND_RECEPTOR_INTERACTION**

| **Symptom** | **Z** | **CI low** | **CI high** | **perm p** | **cov %** |
| --- | --- | --- | --- | --- | --- |
| MDD2_anhedonia | -4.245 | -7.506 | -1.060 | 0.0192 | 66.6 |
| MDD4b_sleepMore | -2.130 | -5.200 | 0.855 | 0.2501 | 66.3 |
| MDD8_concentration | -1.925 | -4.517 | 0.753 | 0.2786 | 66.3 |
| MDD9_death | 1.364 | -1.625 | 4.328 | 0.4358 | 66.6 |
| MDD3b_weightGain | -1.229 | -4.538 | 2.243 | 0.4962 | 66.3 |
| MDD4a_sleepProb | 1.058 | -1.658 | 3.871 | 0.5480 | 66.3 |
| MDD7_worthless | 0.761 | -2.541 | 3.947 | 0.6806 | 66.0 |
| MDD5b_psychomotorSlow | -0.689 | -3.685 | 2.321 | 0.6900 | 66.3 |
| MDD6_fatigue | -0.438 | -3.763 | 2.568 | 0.8044 | 65.5 |
| MDD3a_weightLoss | 0.228 | -3.284 | 3.593 | 0.8927 | 66.3 |
| MDD1_depressed | 0.177 | -2.584 | 2.894 | 0.9189 | 66.0 |
| MDD5a_psychomotorFast | 0.135 | -2.903 | 3.155 | 0.9389 | 66.3 |

### **A13.7 KEGG_PPAR_SIGNALING_PATHWAY**

| **Symptom** | **Z** | **CI low** | **CI high** | **perm p** | **cov %** |
| --- | --- | --- | --- | --- | --- |
| MDD9_death | -2.724 | -6.791 | 1.148 | 0.1257 | 78.9 |
| MDD7_worthless | -2.382 | -6.002 | 1.221 | 0.1909 | 78.9 |
| MDD3b_weightGain | 2.288 | -1.388 | 5.779 | 0.1995 | 78.9 |
| MDD5b_psychomotorSlow | -2.167 | -6.297 | 2.194 | 0.2187 | 78.9 |
| MDD5a_psychomotorFast | 1.838 | -1.795 | 5.257 | 0.3027 | 78.9 |
| MDD8_concentration | 1.604 | -2.293 | 5.512 | 0.3673 | 78.9 |
| MDD2_anhedonia | -1.273 | -4.705 | 2.080 | 0.4780 | 78.9 |
| MDD1_depressed | -0.828 | -4.055 | 2.492 | 0.6368 | 78.9 |
| MDD6_fatigue | -0.709 | -3.954 | 2.605 | 0.6893 | 78.9 |
| MDD4b_sleepMore | 0.455 | -3.067 | 3.874 | 0.8009 | 78.9 |
| MDD3a_weightLoss | 0.395 | -2.744 | 3.470 | 0.8374 | 78.9 |
| MDD4a_sleepProb | 0.308 | -3.121 | 3.583 | 0.8645 | 78.9 |

### **A13.8 KEGG_RAS_SIGNALING_PATHWAY**

| **Symptom** | **Z** | **CI low** | **CI high** | **perm p** | **cov %** |
| --- | --- | --- | --- | --- | --- |
| MDD4b_sleepMore | 2.455 | -0.259 | 5.339 | 0.1816 | 71.8 |
| MDD3b_weightGain | 2.366 | -0.813 | 5.781 | 0.1921 | 71.8 |
| MDD8_concentration | -2.122 | -5.274 | 0.890 | 0.2324 | 71.4 |
| MDD5a_psychomotorFast | 2.078 | -1.254 | 5.496 | 0.2424 | 71.8 |
| MDD6_fatigue | 1.962 | -1.178 | 4.990 | 0.2693 | 70.6 |
| MDD7_worthless | -1.916 | -5.492 | 1.677 | 0.3018 | 71.8 |
| MDD3a_weightLoss | -1.353 | -4.862 | 1.999 | 0.4521 | 71.4 |
| MDD4a_sleepProb | -1.300 | -4.800 | 1.936 | 0.4682 | 71.8 |
| MDD9_death | -1.128 | -4.093 | 1.870 | 0.5242 | 72.3 |
| MDD5b_psychomotorSlow | -0.778 | -3.799 | 2.188 | 0.6623 | 71.8 |
| MDD2_anhedonia | 0.769 | -2.480 | 4.131 | 0.6661 | 71.8 |
| MDD1_depressed | 0.686 | -2.845 | 4.362 | 0.6975 | 71.8 |

### **A13.9 KEGG_REGULATION_OF_ACTIN_CYTOSKELETON**

| **Symptom** | **Z** | **CI low** | **CI high** | **perm p** | **cov %** |
| --- | --- | --- | --- | --- | --- |
| MDD2_anhedonia | 3.504 | 0.371 | 6.635 | 0.0560 | 77.2 |
| MDD3a_weightLoss | -2.590 | -5.641 | 0.396 | 0.1503 | 77.2 |
| MDD4b_sleepMore | -2.297 | -5.560 | 0.879 | 0.2087 | 76.3 |
| MDD9_death | 2.181 | -0.524 | 4.864 | 0.2316 | 77.2 |
| MDD8_concentration | 2.133 | -1.071 | 5.272 | 0.2313 | 77.2 |
| MDD5a_psychomotorFast | 1.999 | -1.328 | 5.481 | 0.2662 | 76.3 |
| MDD1_depressed | 1.579 | -1.323 | 4.662 | 0.3677 | 77.2 |
| MDD5b_psychomotorSlow | -1.253 | -4.547 | 2.080 | 0.4832 | 76.3 |
| MDD7_worthless | -1.162 | -4.369 | 2.003 | 0.5222 | 76.7 |
| MDD3b_weightGain | -0.696 | -3.934 | 2.614 | 0.6969 | 76.3 |
| MDD6_fatigue | -0.672 | -3.882 | 2.452 | 0.6983 | 76.7 |
| MDD4a_sleepProb | -0.566 | -3.877 | 2.886 | 0.7479 | 76.3 |

### **A13.10 KEGG_SYNAPTIC_VESICLE_CYCLE**

| **Symptom** | **Z** | **CI low** | **CI high** | **perm p** | **cov %** |
| --- | --- | --- | --- | --- | --- |
| MDD1_depressed | -2.891 | -6.069 | 0.009 | 0.1030 | 73.4 |
| MDD8_concentration | -2.493 | -5.435 | 0.196 | 0.1623 | 73.4 |
| MDD5a_psychomotorFast | -2.198 | -5.920 | 1.406 | 0.2147 | 73.4 |
| MDD4b_sleepMore | 2.190 | -1.058 | 5.349 | 0.2237 | 73.4 |
| MDD7_worthless | -1.724 | -4.867 | 1.164 | 0.3471 | 73.4 |
| MDD3a_weightLoss | -1.479 | -5.546 | 2.440 | 0.4149 | 73.4 |
| MDD9_death | -1.197 | -3.868 | 1.499 | 0.5012 | 73.4 |
| MDD4a_sleepProb | -1.102 | -4.761 | 2.434 | 0.5331 | 73.4 |
| MDD6_fatigue | 0.479 | -2.676 | 3.643 | 0.7824 | 73.4 |
| MDD3b_weightGain | 0.124 | -3.912 | 4.361 | 0.9480 | 73.4 |
| MDD5b_psychomotorSlow | 0.069 | -2.705 | 2.609 | 0.9713 | 73.4 |
| MDD2_anhedonia | -0.063 | -3.154 | 2.938 | 0.9721 | 73.4 |

## **A14 | Family-wise FDR-significant hits (all 190 entries)**

| **Gene-set** | **Source / Test** | **Comparison** | **p** | **FDR** |
| --- | --- | --- | --- | --- |
| ENDOCYTOSIS | prox / Pearson | MDD1_depressed vs MDD2_anhedonia | 0 | 0 |
| ENDOCYTOSIS | pairwise / Kendall | MDD1_depressed vs MDD2_anhedonia | 0 | 0 |
| MAPK_SIGNALING | prox / Pearson | MDD1_depressed vs MDD2_anhedonia | 0 | 0 |
| NEUROACT_LIG_REC | prox / Spearman | MDD3a_weightLoss vs MDD3b_weightGain | 0 | 0 |
| NEUROACT_LIG_REC | prox / Pearson | MDD1_depressed vs MDD2_anhedonia | 0 | 0 |
| NEUROACT_LIG_REC | pairwise / Kendall | MDD3a_weightLoss vs MDD3b_weightGain | 0 | 0 |
| NEUROACT_LIG_REC | pairwise / Kendall | MDD1_depressed vs MDD2_anhedonia | 0 | 0 |
| NEUROACT_LIG_REC | prox / Spearman | MDD1_depressed vs MDD2_anhedonia | 0 | 0 |
| NEUROACT_LIG_REC | prox / Pearson | MDD3a_weightLoss vs MDD3b_weightGain | 0 | 0 |
| RAS_SIGNALING | pairwise / Kendall | MDD3a_weightLoss vs MDD3b_weightGain | 0 | 0 |
| NEUROACT_LIG_REC | pairwise / sign-conc. | MDD3a_weightLoss vs MDD3b_weightGain | 1e-06 | 1.36e-04 |
| RAS_SIGNALING | prox / Spearman | MDD3a_weightLoss vs MDD3b_weightGain | 1e-06 | 2.37e-04 |
| RAS_SIGNALING | prox / Pearson | MDD1_depressed vs MDD2_anhedonia | 1e-06 | 2.37e-04 |
| RAS_SIGNALING | prox / Pearson | MDD3a_weightLoss vs MDD3b_weightGain | 1e-06 | 2.37e-04 |
| ENDOCYTOSIS | prox / Spearman | MDD1_depressed vs MDD2_anhedonia | 1e-06 | 3.16e-04 |
| NEUROACT_LIG_REC | pairwise / Kendall | MDD2_anhedonia vs MDD8_concentration | 4e-06 | 4.75e-04 |
| ENDOCYTOSIS | pairwise / Paired-t | MDD4b_sleepMore vs MDD3b_weightGain | 4e-06 | 9.49e-04 |
| ENDOCYTOSIS | pairwise / Paired-W | MDD4b_sleepMore vs MDD3b_weightGain | 5e-06 | 9.49e-04 |
| ENDOCYTOSIS | pairwise / Kendall | MDD3a_weightLoss vs MDD3b_weightGain | 7e-06 | 9.49e-04 |
| ENDOCYTOSIS | diff / Paired-W | MDD4b_sleepMore vs MDD3b_weightGain | 7e-06 | 9.49e-04 |
| ENDOCYTOSIS | pairwise / Welch | MDD4b_sleepMore vs MDD3b_weightGain | 9e-06 | 0.00107 |
| ENDOCYTOSIS | prox / Spearman | MDD3a_weightLoss vs MDD3b_weightGain | 1.1e-05 | 0.00116 |
| NEUROACT_LIG_REC | prox / Spearman | MDD2_anhedonia vs MDD8_concentration | 1.2e-05 | 0.00123 |
| NEUROACT_LIG_REC | prox / Pearson | MDD2_anhedonia vs MDD8_concentration | 1.3e-05 | 0.00123 |
| MAPK_SIGNALING | pairwise / Kendall | MDD3a_weightLoss vs MDD3b_weightGain | 3e-06 | 0.00127 |
| MAPK_SIGNALING | pairwise / Kendall | MDD1_depressed vs MDD2_anhedonia | 5e-06 | 0.00127 |
| MAPK_SIGNALING | prox / Spearman | MDD3a_weightLoss vs MDD3b_weightGain | 6e-06 | 0.00127 |
| MAPK_SIGNALING | prox / Spearman | MDD1_depressed vs MDD2_anhedonia | 8e-06 | 0.00127 |
| MAPK_SIGNALING | pairwise / Kendall | MDD2_anhedonia vs MDD8_concentration | 8e-06 | 0.00127 |
| MAPK_SIGNALING | pairwise / Kendall | MDD6_fatigue vs MDD8_concentration | 1.1e-05 | 0.00129 |
| MAPK_SIGNALING | prox / Spearman | MDD2_anhedonia vs MDD8_concentration | 1.2e-05 | 0.00129 |
| MAPK_SIGNALING | pairwise / Kendall | MDD7_worthless vs MDD9_death | 1.3e-05 | 0.00129 |
| MAPK_SIGNALING | prox / Pearson | MDD3a_weightLoss vs MDD3b_weightGain | 1.4e-05 | 0.00129 |
| MAPK_SIGNALING | prox / Spearman | MDD6_fatigue vs MDD8_concentration | 1.5e-05 | 0.00129 |
| MAPK_SIGNALING | prox / Spearman | MDD7_worthless vs MDD9_death | 1.9e-05 | 0.00150 |
| MAPK_SIGNALING | prox / Pearson | MDD2_anhedonia vs MDD8_concentration | 2.6e-05 | 0.00190 |
| MAPK_SIGNALING | prox / Pearson | MDD7_worthless vs MDD9_death | 3.5e-05 | 0.00237 |
| NEUROACT_LIG_REC | prox / Pearson | MDD7_worthless vs MDD8_concentration | 2.8e-05 | 0.00242 |
| NEUROACT_LIG_REC | prox / Pearson | MDD6_fatigue vs MDD8_concentration | 3.1e-05 | 0.00245 |
| RAS_SIGNALING | prox / Spearman | MDD1_depressed vs MDD2_anhedonia | 1.5e-05 | 0.00253 |
| RAS_SIGNALING | pairwise / Kendall | MDD1_depressed vs MDD2_anhedonia | 1.6e-05 | 0.00253 |
| RAS_SIGNALING | pairwise / Kendall | MDD4b_sleepMore vs MDD3b_weightGain | 2e-05 | 0.00271 |
| ENDOCYTOSIS | prox / Pearson | MDD7_worthless vs MDD9_death | 3.1e-05 | 0.00285 |
| ENDOCYTOSIS | pairwise / BM | MDD4b_sleepMore vs MDD3b_weightGain | 3.3e-05 | 0.00285 |
| ENDOCYTOSIS | pairwise / MWU | MDD4b_sleepMore vs MDD3b_weightGain | 4.9e-05 | 0.00388 |
| RAS_SIGNALING | prox / Spearman | MDD4b_sleepMore vs MDD3b_weightGain | 3.5e-05 | 0.00415 |
| ENDOCYTOSIS | diff / MWU | MDD4b_sleepMore vs MDD3b_weightGain | 5.8e-05 | 0.00423 |
| ENDOCYTOSIS | prox / Pearson | MDD3a_weightLoss vs MDD3b_weightGain | 6.8e-05 | 0.00461 |
| AUTOPHAGY_ANIMAL | prox / Pearson | MDD1_depressed vs MDD2_anhedonia | 7e-06 | 0.00522 |
| AUTOPHAGY_ANIMAL | prox / Pearson | MDD6_fatigue vs MDD8_concentration | 1.1e-05 | 0.00522 |
| ENDOCYTOSIS | pairwise / Permutation | MDD4b_sleepMore vs MDD3b_weightGain | 1e-04 | 0.00633 |
| AUTOPHAGY_ANIMAL | prox / Spearman | MDD6_fatigue vs MDD8_concentration | 2.7e-05 | 0.00641 |
| AUTOPHAGY_ANIMAL | pairwise / Kendall | MDD1_depressed vs MDD2_anhedonia | 2.7e-05 | 0.00641 |
| MAPK_SIGNALING | prox / Pearson | MDD6_fatigue vs MDD8_concentration | 1.02e-04 | 0.00645 |
| AUTOPHAGY_ANIMAL | prox / Spearman | MDD1_depressed vs MDD2_anhedonia | 3.7e-05 | 0.00649 |
| AUTOPHAGY_ANIMAL | pairwise / Kendall | MDD6_fatigue vs MDD8_concentration | 4.1e-05 | 0.00649 |
| NEUROACT_LIG_REC | pairwise / sign-conc. | MDD2_anhedonia vs MDD8_concentration | 1.03e-04 | 0.00752 |
| RAS_SIGNALING | prox / Pearson | MDD4b_sleepMore vs MDD3b_weightGain | 9.3e-05 | 0.00949 |
| RAS_SIGNALING | pairwise / Kendall | MDD2_anhedonia vs MDD8_concentration | 1e-04 | 0.00949 |
| ENDOCYTOSIS | pairwise / Kendall | MDD7_worthless vs MDD9_death | 1.61e-04 | 0.00955 |
| AUTOPHAGY_ANIMAL | pairwise / Kendall | MDD3a_weightLoss vs MDD3b_weightGain | 7.7e-05 | 0.01044 |
| RAS_SIGNALING | prox / Spearman | MDD2_anhedonia vs MDD8_concentration | 1.31e-04 | 0.01052 |
| RAS_SIGNALING | prox / Pearson | MDD4a_sleepProb vs MDD3a_weightLoss | 1.33e-04 | 0.01052 |
| MAPK_SIGNALING | prox / Pearson | MDD2_anhedonia vs MDD7_worthless | 1.85e-04 | 0.01097 |
| ENDOCYTOSIS | pairwise / Kendall | MDD2_anhedonia vs MDD8_concentration | 1.98e-04 | 0.01105 |
| AUTOPHAGY_ANIMAL | prox / Spearman | MDD3a_weightLoss vs MDD3b_weightGain | 1e-04 | 0.01186 |
| ENDOCYTOSIS | prox / Spearman | MDD7_worthless vs MDD9_death | 2.27e-04 | 0.01197 |
| MAPK_SIGNALING | pairwise / Kendall | MDD1_depressed vs MDD6_fatigue | 2.28e-04 | 0.01273 |
| ENDOCYTOSIS | prox / Pearson | MDD7_worthless vs MDD8_concentration | 2.62e-04 | 0.01309 |
| ENDOCYTOSIS | pairwise / sign-conc. | MDD3a_weightLoss vs MDD3b_weightGain | 2.81e-04 | 0.01333 |
| NEUROACT_LIG_REC | pairwise / Kendall | MDD6_fatigue vs MDD8_concentration | 2.06e-04 | 0.01396 |
| ENDOCYTOSIS | prox / Spearman | MDD7_worthless vs MDD8_concentration | 3.42e-04 | 0.01499 |
| ENDOCYTOSIS | prox / Pearson | MDD4a_sleepProb vs MDD8_concentration | 3.67e-04 | 0.01499 |
| ENDOCYTOSIS | pairwise / Welch | MDD1_depressed vs MDD4b_sleepMore | 3.68e-04 | 0.01499 |
| ENDOCYTOSIS | prox / Spearman | MDD2_anhedonia vs MDD8_concentration | 3.79e-04 | 0.01499 |
| ENDOCYTOSIS | enrich / permutation | MDD4b_sleepMore | 4e-04 | 0.01518 |
| ENDOCYTOSIS | pairwise / Paired-t | MDD4b_sleepMore vs MDD5b_psychomotorSlow | 4.2e-04 | 0.01533 |
| AUTOPHAGY_ANIMAL | prox / Pearson | MDD1_depressed vs MDD6_fatigue | 1.49e-04 | 0.01571 |
| NEUROACT_LIG_REC | prox / Spearman | MDD6_fatigue vs MDD8_concentration | 2.73e-04 | 0.01727 |
| ENDOCYTOSIS | enrich / wilcoxon | MDD4b_sleepMore | 4.92e-04 | 0.01729 |
| REG_ACTIN_CYTOSK | prox / Pearson | MDD1_depressed vs MDD2_anhedonia | 2e-05 | 0.01765 |
| REG_ACTIN_CYTOSK | prox / Pearson | MDD3a_weightLoss vs MDD3b_weightGain | 4.9e-05 | 0.01765 |
| REG_ACTIN_CYTOSK | pairwise / Kendall | MDD3a_weightLoss vs MDD3b_weightGain | 8.1e-05 | 0.01765 |
| REG_ACTIN_CYTOSK | prox / Spearman | MDD3a_weightLoss vs MDD3b_weightGain | 8.2e-05 | 0.01765 |
| REG_ACTIN_CYTOSK | prox / Pearson | MDD6_fatigue vs MDD8_concentration | 9.3e-05 | 0.01765 |
| ENDOCYTOSIS | prox / Spearman | MDD4a_sleepProb vs MDD8_concentration | 5.43e-04 | 0.01840 |
| RAS_SIGNALING | pairwise / Kendall | MDD6_fatigue vs MDD8_concentration | 2.58e-04 | 0.01883 |
| ENDOCYTOSIS | pairwise / Paired-t | MDD1_depressed vs MDD4b_sleepMore | 6.12e-04 | 0.01999 |
| ENDOCYTOSIS | pairwise / Kendall | MDD4a_sleepProb vs MDD8_concentration | 6.43e-04 | 0.01999 |
| ENDOCYTOSIS | pairwise / Kendall | MDD6_fatigue vs MDD5b_psychomotorSlow | 6.53e-04 | 0.01999 |
| NEUROACT_LIG_REC | pairwise / Kendall | MDD4a_sleepProb vs MDD5a_psychomotorFast | 3.47e-04 | 0.02058 |
| FATTY_ACID_DEGRAD | pairwise / BM | MDD7_worthless vs MDD3b_weightGain | 3.1e-05 | 0.0221 |
| FATTY_ACID_DEGRAD | pairwise / Paired-t | MDD7_worthless vs MDD3b_weightGain | 1.09e-04 | 0.0221 |
| FATTY_ACID_DEGRAD | pairwise / KS | MDD7_worthless vs MDD3b_weightGain | 1.4e-04 | 0.0221 |
| FATTY_ACID_DEGRAD | diff / Paired-W | MDD7_worthless vs MDD3b_weightGain | 1.51e-04 | 0.0221 |
| FATTY_ACID_DEGRAD | pairwise / Paired-W | MDD7_worthless vs MDD3b_weightGain | 1.51e-04 | 0.0221 |
| FATTY_ACID_DEGRAD | diff / MWU | MDD7_worthless vs MDD3b_weightGain | 1.63e-04 | 0.0221 |
| FATTY_ACID_DEGRAD | pairwise / MWU | MDD7_worthless vs MDD3b_weightGain | 1.63e-04 | 0.0221 |
| MAPK_SIGNALING | pairwise / sign-conc. | MDD3a_weightLoss vs MDD3b_weightGain | 4.43e-04 | 0.02298 |
| MAPK_SIGNALING | prox / Spearman | MDD1_depressed vs MDD6_fatigue | 4.6e-04 | 0.02298 |
| RAS_SIGNALING | prox / Spearman | MDD6_fatigue vs MDD8_concentration | 3.45e-04 | 0.02339 |
| FATTY_ACID_DEGRAD | pairwise / Permutation | MDD7_worthless vs MDD3b_weightGain | 2e-04 | 0.02372 |
| ENDOCYTOSIS | pairwise / Welch | MDD4b_sleepMore vs MDD5b_psychomotorSlow | 8.23e-04 | 0.02441 |
| ENDOCYTOSIS | pairwise / Kendall | MDD7_worthless vs MDD8_concentration | 8.5e-04 | 0.02444 |
| ENDOCYTOSIS | pairwise / Permutation | MDD4b_sleepMore vs MDD5b_psychomotorSlow | 9e-04 | 0.02508 |
| ENDOCYTOSIS | pairwise / Paired-t | MDD4b_sleepMore vs MDD7_worthless | 9.25e-04 | 0.02508 |
| RAS_SIGNALING | prox / Spearman | MDD3a_weightLoss vs MDD9_death | 4.04e-04 | 0.02556 |
| ENDOCYTOSIS | pairwise / Permutation | MDD1_depressed vs MDD4b_sleepMore | 1e-03 | 0.02565 |
| ENDOCYTOSIS | pairwise / KS | MDD4b_sleepMore vs MDD3b_weightGain | 0.00103 | 0.02565 |
| ENDOCYTOSIS | pairwise / KS | MDD4b_sleepMore vs MDD5b_psychomotorSlow | 0.00103 | 0.02565 |
| ENDOCYTOSIS | pairwise / BM | MDD4b_sleepMore vs MDD5b_psychomotorSlow | 0.00110 | 0.0262 |
| ENDOCYTOSIS | prox / Spearman | MDD6_fatigue vs MDD5b_psychomotorSlow | 0.00112 | 0.0262 |
| ENDOCYTOSIS | pairwise / Welch | MDD4b_sleepMore vs MDD7_worthless | 0.00113 | 0.0262 |
| MAPK_SIGNALING | prox / Pearson | MDD2_anhedonia vs MDD9_death | 5.57e-04 | 0.02643 |
| REG_ACTIN_CYTOSK | prox / Spearman | MDD6_fatigue vs MDD8_concentration | 1.77e-04 | 0.02671 |
| REG_ACTIN_CYTOSK | pairwise / Kendall | MDD6_fatigue vs MDD8_concentration | 1.97e-04 | 0.02671 |
| FATTY_ACID_DEGRAD | pairwise / Welch | MDD7_worthless vs MDD3b_weightGain | 2.56e-04 | 0.02699 |
| ENDOCYTOSIS | pairwise / MWU | MDD4b_sleepMore vs MDD5b_psychomotorSlow | 0.00123 | 0.027 |
| ENDOCYTOSIS | diff / MWU | MDD4b_sleepMore vs MDD3a_weightLoss | 0.00124 | 0.027 |
| ENDOCYTOSIS | prox / Pearson | MDD6_fatigue vs MDD7_worthless | 0.00125 | 0.027 |
| ENDOCYTOSIS | pairwise / Welch | MDD4b_sleepMore vs MDD3a_weightLoss | 0.00129 | 0.02718 |
| ENDOCYTOSIS | prox / Pearson | MDD6_fatigue vs MDD8_concentration | 0.00137 | 0.02758 |
| ENDOCYTOSIS | diff / MWU | MDD1_depressed vs MDD4b_sleepMore | 0.00141 | 0.02758 |
| ENDOCYTOSIS | prox / Spearman | MDD6_fatigue vs MDD8_concentration | 0.00142 | 0.02758 |
| ENDOCYTOSIS | pairwise / Welch | MDD2_anhedonia vs MDD4b_sleepMore | 0.00147 | 0.02758 |
| ENDOCYTOSIS | pairwise / Paired-t | MDD2_anhedonia vs MDD4b_sleepMore | 0.00147 | 0.02758 |
| ENDOCYTOSIS | diff / MWU | MDD4b_sleepMore vs MDD5b_psychomotorSlow | 0.00148 | 0.02758 |
| ENDOCYTOSIS | pairwise / Paired-t | MDD4b_sleepMore vs MDD3a_weightLoss | 0.00155 | 0.02815 |
| ENDOCYTOSIS | prox / Pearson | MDD2_anhedonia vs MDD8_concentration | 0.00160 | 0.02815 |
| ENDOCYTOSIS | pairwise / Paired-W | MDD4b_sleepMore vs MDD5b_psychomotorSlow | 0.00161 | 0.02815 |
| ENDOCYTOSIS | pairwise / BM | MDD4b_sleepMore vs MDD3a_weightLoss | 0.00164 | 0.02815 |
| ENDOCYTOSIS | pairwise / BM | MDD1_depressed vs MDD4b_sleepMore | 0.00166 | 0.02815 |
| ENDOCYTOSIS | pairwise / Kendall | MDD6_fatigue vs MDD8_concentration | 0.00183 | 0.0300 |
| ENDOCYTOSIS | pairwise / MWU | MDD4b_sleepMore vs MDD3a_weightLoss | 0.00183 | 0.0300 |
| ENDOCYTOSIS | pairwise / MWU | MDD1_depressed vs MDD4b_sleepMore | 0.00188 | 0.03005 |
| ENDOCYTOSIS | pairwise / Permutation | MDD4b_sleepMore vs MDD7_worthless | 0.0019 | 0.03005 |
| ENDOCYTOSIS | pairwise / Kendall | MDD1_depressed vs MDD8_concentration | 0.00194 | 0.03013 |
| ENDOCYTOSIS | diff / Paired-W | MDD4b_sleepMore vs MDD5b_psychomotorSlow | 0.00198 | 0.03031 |
| ENDOCYTOSIS | prox / Pearson | MDD8_concentration vs MDD9_death | 0.00211 | 0.03091 |
| ENDOCYTOSIS | pairwise / sign-conc. | MDD7_worthless vs MDD9_death | 0.00215 | 0.03091 |
| ENDOCYTOSIS | pairwise / KS | MDD1_depressed vs MDD4b_sleepMore | 0.00216 | 0.03091 |
| ENDOCYTOSIS | pairwise / Paired-W | MDD4b_sleepMore vs MDD7_worthless | 0.00218 | 0.03091 |
| ENDOCYTOSIS | diff / Paired-W | MDD4b_sleepMore vs MDD7_worthless | 0.00218 | 0.03091 |
| MAPK_SIGNALING | pairwise / sign-conc. | MDD1_depressed vs MDD6_fatigue | 6.93e-04 | 0.03132 |
| AUTOPHAGY_ANIMAL | pairwise / sign-conc. | MDD3a_weightLoss vs MDD3b_weightGain | 3.33e-04 | 0.0316 |
| ENDOCYTOSIS | pairwise / BM | MDD4b_sleepMore vs MDD7_worthless | 0.00236 | 0.03287 |
| ENDOCYTOSIS | prox / Pearson | MDD1_depressed vs MDD6_fatigue | 0.00243 | 0.03348 |
| ENDOCYTOSIS | pairwise / Permutation | MDD2_anhedonia vs MDD4b_sleepMore | 0.0025 | 0.03389 |
| ENDOCYTOSIS | pairwise / MWU | MDD4b_sleepMore vs MDD7_worthless | 0.00258 | 0.03448 |
| ENDOCYTOSIS | pairwise / sign-conc. | MDD6_fatigue vs MDD5b_psychomotorSlow | 0.00265 | 0.03492 |
| REG_ACTIN_CYTOSK | prox / Pearson | MDD6_fatigue vs MDD2_anhedonia | 3.05e-04 | 0.03618 |
| NEUROACT_LIG_REC | prox / Spearman | MDD4a_sleepProb vs MDD5a_psychomotorFast | 6.91e-04 | 0.0368 |
| NEUROACT_LIG_REC | pairwise / sign-conc. | MDD6_fatigue vs MDD8_concentration | 6.98e-04 | 0.0368 |
| ENDOCYTOSIS | pairwise / sign-conc. | MDD1_depressed vs MDD2_anhedonia | 0.00292 | 0.03789 |
| ENDOCYTOSIS | prox / Spearman | MDD1_depressed vs MDD8_concentration | 0.00304 | 0.03813 |
| ENDOCYTOSIS | diff / MWU | MDD4b_sleepMore vs MDD7_worthless | 0.00301 | 0.03813 |
| ENDOCYTOSIS | diff / Paired-W | MDD2_anhedonia vs MDD4b_sleepMore | 0.00305 | 0.03813 |
| ENDOCYTOSIS | diff / MWU | MDD2_anhedonia vs MDD4b_sleepMore | 0.00311 | 0.03837 |
| FATTY_ACID_DEGRAD | prox / Pearson | MDD4a_sleepProb vs MDD6_fatigue | 4.08e-04 | 0.03872 |
| AUTOPHAGY_ANIMAL | pairwise / Kendall | MDD1_depressed vs MDD6_fatigue | 5.14e-04 | 0.03957 |
| AUTOPHAGY_ANIMAL | prox / Spearman | MDD1_depressed vs MDD6_fatigue | 5.42e-04 | 0.03957 |
| AUTOPHAGY_ANIMAL | pairwise / BM | MDD3a_weightLoss vs MDD3b_weightGain | 5.42e-04 | 0.03957 |
| NEUROACT_LIG_REC | pairwise / Kendall | MDD4b_sleepMore vs MDD3b_weightGain | 7.96e-04 | 0.03976 |
| AUTOPHAGY_ANIMAL | pairwise / Welch | MDD3a_weightLoss vs MDD3b_weightGain | 6e-04 | 0.04004 |
| AUTOPHAGY_ANIMAL | diff / MWU | MDD3a_weightLoss vs MDD3b_weightGain | 6.75e-04 | 0.04004 |
| AUTOPHAGY_ANIMAL | pairwise / MWU | MDD3a_weightLoss vs MDD3b_weightGain | 6.75e-04 | 0.04004 |
| ENDOCYTOSIS | prox / Spearman | MDD1_depressed vs MDD6_fatigue | 0.00335 | 0.04073 |
| RAS_SIGNALING | pairwise / Kendall | MDD3a_weightLoss vs MDD9_death | 6.94e-04 | 0.04116 |
| NEUROACT_LIG_REC | pairwise / Levene | MDD8_concentration vs MDD3b_weightGain | 9.69e-04 | 0.04379 |
| NEUROACT_LIG_REC | pairwise / Levene | MDD3a_weightLoss vs MDD8_concentration | 9.56e-04 | 0.04379 |
| AUTOPHAGY_ANIMAL | enrich / permutation | MDD3a_weightLoss | 8e-04 | 0.04466 |
| AUTOPHAGY_ANIMAL | prox / Pearson | MDD2_anhedonia vs MDD8_concentration | 9.43e-04 | 0.04555 |
| AUTOPHAGY_ANIMAL | prox / Pearson | MDD4a_sleepProb vs MDD5a_psychomotorFast | 9.71e-04 | 0.04555 |
| AUTOPHAGY_ANIMAL | diff / Paired-W | MDD6_fatigue vs MDD3a_weightLoss | 0.00101 | 0.04555 |
| AUTOPHAGY_ANIMAL | pairwise / Paired-W | MDD6_fatigue vs MDD3a_weightLoss | 0.00101 | 0.04555 |
| AUTOPHAGY_ANIMAL | prox / Pearson | MDD3a_weightLoss vs MDD3b_weightGain | 0.00106 | 0.0456 |
| ENDOCYTOSIS | pairwise / Permutation | MDD4b_sleepMore vs MDD3a_weightLoss | 0.0038 | 0.04565 |
| REG_ACTIN_CYTOSK | pairwise / Kendall | MDD6_fatigue vs MDD2_anhedonia | 4.34e-04 | 0.04576 |
| ENDOCYTOSIS | pairwise / Kendall | MDD1_depressed vs MDD6_fatigue | 0.0039 | 0.04626 |
| RAS_SIGNALING | prox / Pearson | MDD4a_sleepProb vs MDD2_anhedonia | 8.39e-04 | 0.04684 |
| REG_ACTIN_CYTOSK | prox / Pearson | MDD2_anhedonia vs MDD5a_psychomotorFast | 4.95e-04 | 0.04698 |
| MAPK_SIGNALING | prox / Pearson | MDD1_depressed vs MDD6_fatigue | 0.00115 | 0.04717 |
| MAPK_SIGNALING | pairwise / Kendall | MDD4a_sleepProb vs MDD8_concentration | 0.00117 | 0.04717 |
| MAPK_SIGNALING | pairwise / sign-conc. | MDD2_anhedonia vs MDD8_concentration | 0.00119 | 0.04717 |
| ENDOCYTOSIS | pairwise / BM | MDD2_anhedonia vs MDD4b_sleepMore | 0.00407 | 0.04771 |
| ENDOCYTOSIS | pairwise / Paired-t | MDD4b_sleepMore vs MDD9_death | 0.00431 | 0.04931 |
| ENDOCYTOSIS | pairwise / MWU | MDD2_anhedonia vs MDD4b_sleepMore | 0.00435 | 0.04931 |
| ENDOCYTOSIS | diff / Paired-W | MDD1_depressed vs MDD4b_sleepMore | 0.00437 | 0.04931 |
| ENDOCYTOSIS | pairwise / Welch | MDD4b_sleepMore vs MDD5a_psychomotorFast | 0.00443 | 0.04931 |
| ENDOCYTOSIS | pairwise / Paired-W | MDD2_anhedonia vs MDD4b_sleepMore | 0.00447 | 0.04931 |

prox = profile proximity; pairwise = pairwise disease statistical tests; diff = differential tests; enrich = per-disease enrichment; BM = Brunner–Munzel; MWU = Mann–Whitney U; KS = Kolmogorov–Smirnov; Paired-W = paired Wilcoxon; sign-conc. = sign-concordance.
